# Supplementary material
Source: ML conference proceedings conference paper supplement (https://aclanthology.org/2022.emnlp-main.213)
Supplement: note [file 2022.emnlp-main.213.note.pdf]

There are no required responses or changes in the ethical meta review.
